# Supplementary material for: Immobilization Systems of Antimicrobial Peptide Ib−M1 in Polymeric Nanoparticles Based on Alginate and Chitosan
Source: MDPI journal article supplement (doi:10.3390/polym14153149), 2022-08-02
Supplement: s1 [file s1]

Supplementary

# Immobilization Systems of Antimicrobial Peptide Ib-M1 in Polymeric Nanoparticles Based on Alginate and Chitosan

Carlos Enrique Osorio-Alvarado <sup>1,\*</sup>, Jose Luis Ropero-Vega <sup>1</sup>, Ana Elvira Farfán-García <sup>2</sup>  
and Johanna Marcela Flórez-Castillo <sup>1,\*</sup>

<sup>1</sup> Universidad de Santander, Facultad de Ciencias Naturales, Ciencias Básicas y Aplicadas para la Sostenibilidad-CIBAS, Calle 70 No. 55-210, Bucaramanga 680003, Colombia; jose.ropero@udes.edu.co

<sup>2</sup> Universidad de Santander, Facultad de Ciencias Médicas y de la Salud, Instituto de Investigación Masira, Calle 70 No. 55-210, Bucaramanga 680003, Colombia; afarfan@udes.edu.co

\* Correspondence: c.osorio1202@gmail.com (C.E.O.-A.); johanna.florez@udes.edu.co (J.M.F.-C.); Tel.: +57-7606-516500 (ext. 1665) (J.M.F.-C.)

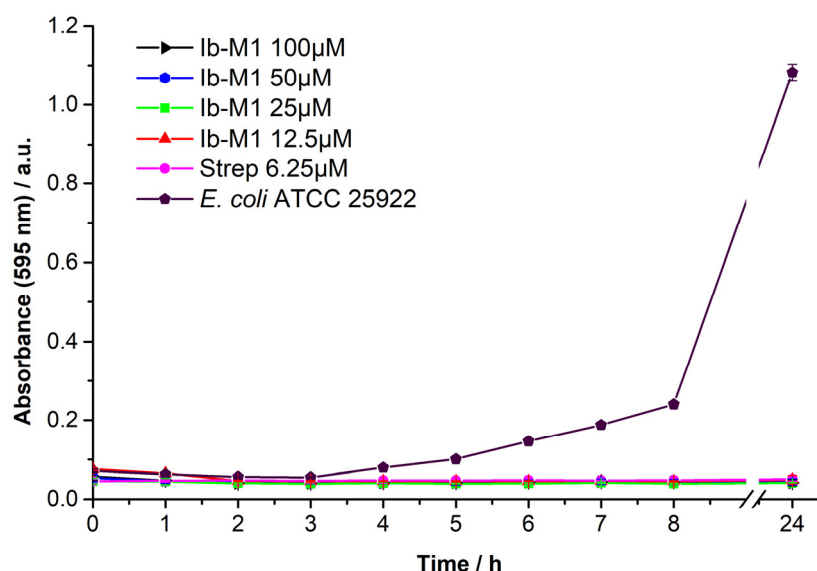

**Figure S1. A.** Growth kinetics of *E. coli* ATCC 25922 in the presence of peptide Ib-M1 at concentrations of 100  $\mu$ M ( $\blacktriangleright$ ), 50  $\mu$ M ( $\bullet$ ), 25  $\mu$ M ( $\blacksquare$ ), 12.5  $\mu$ M ( $\blacktriangle$ ), streptomycin used as reference antibiotic 6.25  $\mu$ M ( $\bullet$ ), *E. coli* as growth control ( $\blacklozenge$ ).

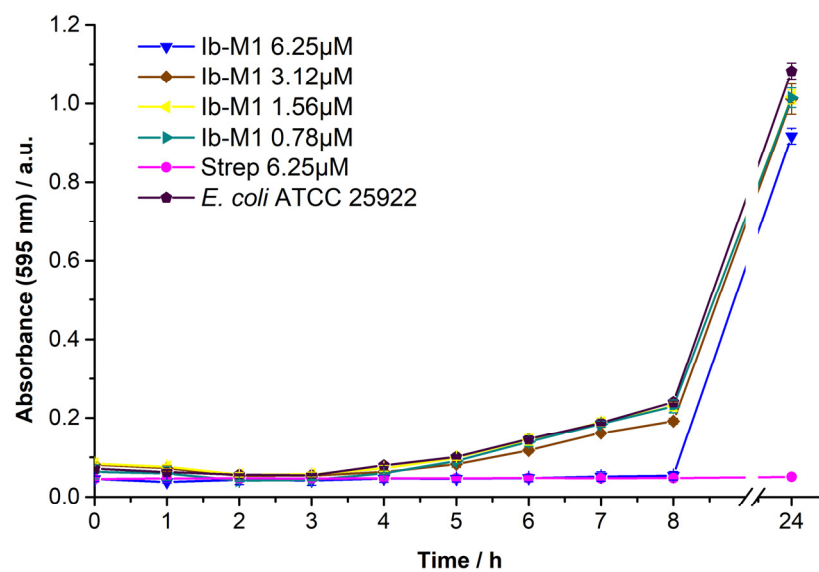

**Figure S1. B.** Growth kinetics of *E. coli* ATCC 25922 in the presence of peptide Ib-M1 at concentrations 6.25µM (▼), 3.12 µM (◆), 1.56 µM (▲), 0.78 µM (▸), streptomycin used as reference antibiotic 6.25 µM (●), *E. coli* as growth control (◆).
